# Supplementary material for: Labdane-Type Diterpenes, Galangalditerpenes A–C, with Melanogenesis Inhibitory Activity from the Fruit of Alpinia galanga
Source: MDPI journal article supplement (doi:10.3390/molecules22122279), 2017-12-20
Supplement: s1 [file s1]

## Supplementary Materials:

# Labdane-type Diterpenes, Galangalditerpenes A–C, with Melanogenesis Inhibitory Activity from the Fruit of *Alpinia galanga*

Yoshiaki Manse <sup>1</sup>, Kiyofumi Ninomiya <sup>1,2</sup>, Ryosuke Nishi <sup>1</sup>, Yoshinori Hashimoto <sup>1</sup>, Saowanee Chaipech <sup>1,3</sup>, Osamu Muraoka <sup>1,2</sup> and Toshio Morikawa <sup>1,2,\*</sup>

<sup>1</sup> Pharmaceutical Research and Technology Institute, Kindai University, 3-4-1 Kowakae, Higashi-osaka, Osaka 577-8502, Japan; yoshiaki4849sa735@gmail.com (Y.M.); ninomiya@phar.kindai.ac.jp (K.N.); kojirou922@gmail.com (R.N.); yoshinorihashimoto0608@gmail.com (Y.H.); chaipechann@hotmail.com (S.C.); muraoka@phar.kindai.ac.jp (O.M.)

<sup>2</sup> Antiaging Center, Kindai University, 3-4-1 Kowakae, Higashi-osaka, Osaka 577-8502, Japan

<sup>3</sup> Faculty of Agro-Industry, Rajamangala University of Technology Srivijaya, Thungyai, Nakhon Si Thammarat 80240, Thailand

\* Correspondence: morikawa@kindai.ac.jp; Tel.: +81-6-4307-4306

**Table S1.** Effects on activity of tyrosinase from mushroom.

| Treatment                                       | Inhibition (%)        |                   |                   |                   |                   |                             |
|-------------------------------------------------|-----------------------|-------------------|-------------------|-------------------|-------------------|-----------------------------|
|                                                 | Substrate: L-Tyrosine |                   |                   | Substrate: L-DOPA |                   |                             |
|                                                 | 0 $\mu$ M             | 10 $\mu$ M        | 100 $\mu$ M       | 0 $\mu$ M         | 10 $\mu$ M        | 100 $\mu$ M                 |
| Galangalditerpene A (1)                         | 0.0 $\pm$ 2.7         | 5.2 $\pm$ 2.1     | 27.8 $\pm$ 2.1 ** | 0.0 $\pm$ 3.3     | 4.6 $\pm$ 1.0     | 9.2 $\pm$ 1.2 *             |
| Galangalditerpene B (2)                         | 0.0 $\pm$ 2.5         | −0.2 $\pm$ 0.6    | 2.6 $\pm$ 0.9     | 0.0 $\pm$ 1.7     | 3.9 $\pm$ 1.7     | 0.7 $\pm$ 0.8               |
| Galangalditerpene C (3)                         | 0.0 $\pm$ 0.8         | −6.3 $\pm$ 1.8    | 1.4 $\pm$ 6.7     | 0.0 $\pm$ 2.5     | −5.0 $\pm$ 0.4    | −2.3 $\pm$ 1.0              |
| Clovane-2 $\beta$ ,9 $\alpha$ -diol (4)         | 0.0 $\pm$ 1.6         | 1.2 $\pm$ 3.7     | 8.2 $\pm$ 1.6     | 0.0 $\pm$ 1.3     | 0.8 $\pm$ 1.5     | −5.8 $\pm$ 1.2 *            |
| Caryolane-1,9 $\beta$ -diol (5)                 | 0.0 $\pm$ 1.4         | 5.4 $\pm$ 1.0 *   | 3.6 $\pm$ 1.6     | 0.0 $\pm$ 2.9     | 10.7 $\pm$ 3.0 *  | 14.7 $\pm$ 1.5 **           |
| (−)-2-Oxoisodauc-5-en-12-al (6)                 | 0.0 $\pm$ 1.1         | −2.4 $\pm$ 1.1    | −1.0 $\pm$ 1.4    | 0.0 $\pm$ 3.9     | 1.8 $\pm$ 2.0     | 0.7 $\pm$ 1.8               |
| Kobusone (7)                                    | 0.0 $\pm$ 0.5         | 1.2 $\pm$ 1.7     | 0.7 $\pm$ 1.5     | 0.0 $\pm$ 1.2     | −10.1 $\pm$ 2.2 * | −12.5 $\pm$ 2.5 **          |
| Galanolactone (8)                               | 0.0 $\pm$ 1.3         | 2.3 $\pm$ 1.5     | 6.6 $\pm$ 1.4 *   | 0.0 $\pm$ 1.9     | −6.0 $\pm$ 1.1 *  | −5.9 $\pm$ 1.0 *            |
| (E)-15,16-Bisnorlabda-8(17),11-diene-13-one (9) | 0.0 $\pm$ 1.0         | 2.1 $\pm$ 0.9     | 2.2 $\pm$ 1.1     | 0.0 $\pm$ 2.8     | −9.7 $\pm$ 1.5 *  | −4.8 $\pm$ 1.6              |
| Inhibition (%)                                  |                       |                   |                   |                   |                   |                             |
| Substrate: L-Tyrosine                           |                       |                   |                   |                   |                   |                             |
| Treatment                                       | 0 $\mu$ M             | 10 $\mu$ M        | 30 $\mu$ M        | 100 $\mu$ M       | 300 $\mu$ M       | IC <sub>50</sub> ( $\mu$ M) |
| Kojic acid [13,24,26–29]                        | 0.0 $\pm$ 2.4         | 12.2 $\pm$ 3.3    | 46.4 $\pm$ 2.6 ** | 66.5 $\pm$ 2.1 ** | 96.8 $\pm$ 0.9 ** | 43.6                        |
| Inhibition (%)                                  |                       |                   |                   |                   |                   |                             |
| Substrate: L-DOPA                               |                       |                   |                   |                   |                   |                             |
| Treatment                                       | 0 $\mu$ M             | 10 $\mu$ M        | 30 $\mu$ M        | 100 $\mu$ M       | 300 $\mu$ M       | IC <sub>50</sub> ( $\mu$ M) |
| Kojic acid [13,24,26–29]                        | 0.0 $\pm$ 0.9         | 22.3 $\pm$ 2.1 ** | 50.6 $\pm$ 0.6 ** | 78.2 $\pm$ 0.7 ** | 89.3 $\pm$ 0.3 ** | 29.6                        |

Each value represents the mean  $\pm$  S.E.M. ( $n = 4$ ); asterisks denote significant differences from the control group, \*  $p < 0.05$ , \*\*  $p < 0.01$ ; commercial kojic acid was purchased from Nakalai Tesque Inc., (Kyoto, Japan).
